# Supplementary material
Source: publisher figshare collection journal article supplement (https://sage.figshare.com/ndownloader/files/15460265)
Supplement: Supplementary file [file 15460265]

## Appendix 1: Details on the EM algorithm to detect outliers

For each of the hormones separately, the EM algorithm was applied to the residuals of all subjects simultaneously, where the residual of the  $i$ th measurement of subject  $j$  was calculated as  $R_{ij} = Y_{ij} - \hat{Y}_{ij}$ , with  $Y_{ij}$  the observed measurement and  $\hat{Y}_{ij}$ , the moving average smoothed estimate.

We assumed that there were two types of measurements: true measurements and erroneous measurements. We expected that the residuals of the true measurements had standard deviations close to 0, while erroneous measurements had a much larger standard deviation.

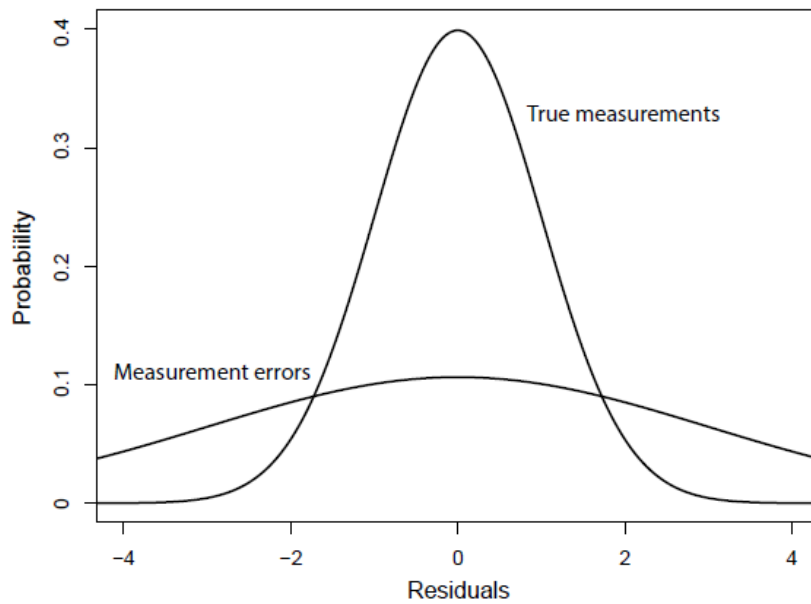

The (unobserved) indicator variable  $Z$  denotes whether a measurement is an error, with  $Z_{ij}=1$  if the  $i$ th measurement of subject  $j$  is an error and  $Z_{ij}=0$  if it is a true measurement. The proportion of erroneous measurements  $\Pr(Z_{ij}=1)$  is denoted by  $\pi_e$ . We assumed that residuals  $R$  of true measurements were normally distributed with mean 0 and standard deviation  $\sigma_1$  while the residuals of the erroneous measurements were normally distributed with mean 0 and standard deviation  $\sigma_2$ , with  $\sigma_2 \gg \sigma_1$ . The proportion of erroneous parameters  $\pi_e$  and the standard deviations  $\sigma_1$  and  $\sigma_2$ , can be estimated using maximum likelihood. The complete likelihood of the data is

$$L(\sigma_1, \sigma_2; R, Z) = \prod_{ij} f(R_{ij}; \sigma_1)^{(1-Z_{ij})} f(R_{ij}; \sigma_2)^{Z_{ij}},$$

with  $f(\cdot; \sigma_i)$ , the normal density with mean 0 and standard deviation  $\sigma_i$ . Because the  $Z_{ij}$  are unobserved, the EM algorithm is applied, with following EM steps:

**E step:** given current estimates  $p_e$ ,  $s_1$  and  $s_2$  for  $\pi_e$ ,  $\sigma_1$  and  $\sigma_2$ , the expected probability to be an error is estimated using Bayes formula:

$$\Pr(Z_{ij}=1 | R_{ij}) = \frac{p_e f(R_{ij}; s_2)}{(1-p_e)f(R_{ij}; s_1) + p_e f(R_{ij}; s_2)} \quad (1)$$

**M step:** the likelihood function where the  $Z_{ij}$  are replaced by the expected probabilities that  $Z_{ij}$  is 1, is maximized.

The EM steps are repeated until convergence. The final estimates  $p_e$ ,  $s_1$  and  $s_2$  are filled in in equation (1). This yields for each measurement an estimated probability to be an error measurement.

The EM algorithm was applied in R version 3.5.1, using the `normalmixEM` function of the package `mixtools`.

## Reference

Benaglia T, Chauveau D, Hunter DR, Young D (2009). `mixtools`: An R Package for Analyzing Finite Mixture Models. *Journal of Statistical Software*, 32(6), 1-29. URL <http://www.jstatsoft.org/v32/i06/>.
